Reserved space. Do not place any text in this section. Include the mandatory author checklist or your manuscript will be returned. Use continuous line numbering in your manuscript.

1 **Article Summary Line:** The use of both Google and NAVER RSV to explore the patterns of  
2 community health risk perception toward COVID-19 in South Korea could be beneficial for  
3 targeting risk communication in several perspectives including time, population characteristics,  
4 and location.

5 **Running Title:** Public health risk perception of COVID-19 in South Korea

6 **Keywords:** Google Trends; risk perception; risk communication; COVID-19; South Korea

7

8 **Title:** Assessing the community risk perception toward COVID-19 outbreak in South  
9 Korea: evidence from Google and NAVER relative search volume

10 **Authors:** Atina Husnayain, Eunha Shim, Anis Fuad, Emily Chia-Yu Su

11 **Affiliations:**

12 Graduate Institute of Biomedical Informatics, College of Medical Science and Technology,  
13 Taipei Medical University, Taipei, Taiwan (A. Husnayain, ECY. Su)

14 Department of Biostatistics, Epidemiology, and Population Health, Faculty of Medicine, Public  
15 Health and Nursing, Universitas Gadjah Mada, Yogyakarta, Indonesia (A. Husnayain, A. Fuad)

16 Department of Mathematics, Soongsil University, Seoul, Korea (E. Shim)

17 Clinical Big Data Research Centre, Taipei Medical University Hospital, Taipei, Taiwan (ECY.  
18 Su)

Reserved space. Do not place any text in this section. Include the mandatory author checklist or your manuscript will be returned. Use continuous line numbering in your manuscript.

19 Research Centre for Artificial Intelligence in Medicine, Taipei Medical University, Taipei,  
20 Taiwan (ECY. Su)

21

22 **Abstract—word count: 150**

23 This study aimed to explore the patterns of community health risk perception of coronavirus  
24 disease 2019 (COVID-19) in South Korea using Internet search data. Google and NAVER  
25 relative search volume data were collected using COVID-19-related terms in Korean language.  
26 Online queries were compared with the number of new COVID-19 cases and tests. Time series  
27 trends and Spearman’s rank correlation coefficients showed that the number of COVID-19-  
28 related queries in South Korea increased during the local and international events; higher in  
29 women, certain age groups; and higher in affected areas, which represented the community  
30 health risk perception. Greater correlations were found in mobile searches compared to that of  
31 desktop searches, indicating the changing behavior in searching health online information. The  
32 use of both Google and NAVER RSV to explore the patterns of community health risk  
33 perception could be beneficial for targeting risk communication in several perspectives including  
34 time, population characteristics, and location.

35 **Text—word count: 3506**

36 **Introduction**

37 The World Health Organization (WHO) has already declared the coronavirus disease  
38 2019 (COVID-19) outbreak as a pandemic since March 11, 2020 (1). As of April 6, 2020, the  
39 disease has infected 1,210,956 individuals worldwide including 10,284 individuals in South

Reserved space. Do not place any text in this section. Include the mandatory author checklist or your manuscript will be returned. Use continuous line numbering in your manuscript.

40 Korea (2). The first COVID-19 case in South Korea was confirmed on January 20, 2020 (3).  
41 Slow upturns of disease transmission were reported before February 19, 2020; the huge local  
42 clusters observed in Daegu led to the increases in the number of new cases daily (4). Numerous  
43 approaches have been conducted to prevent disease transmission along with coronavirus drive-  
44 through tests and social distancing (5, 6). Coronavirus drive-through tests were identified as a  
45 safe and efficient screening approach, with each test taking approximately 10 minutes, and thus  
46 minimize the cross-infection among testees (6). To date, the average number of daily new cases  
47 is now three times lower than those during the peak of the epidemic (from February 19 to March  
48 15, 2020) (3). Consequently, South Korea has been considered among the best-performing  
49 countries to tackle the pandemic.

50 On the contrary, adequate risk communication could also help minimize the impact of  
51 disease spread (7). Thus, in the pandemic period, the WHO suggests regular risk communication  
52 by updating any changes in the status of pandemic to the public and stakeholders (8). This action  
53 might be challenging since proper risk communication needs a robust understanding of risk  
54 perception which could identify what knowledge the public needs (7). However, studies  
55 exploring risk perception were often conducted using survey methods or content analysis (7, 9-  
56 11), which requires huge resources and takes longer time especially when investigating an  
57 emerging disease. This approach might be less affordable since the health system will be  
58 overburdened with the surge of healthcare utilizations, thus causing more barriers for assessing  
59 the community health risk perception.

60 Therefore, this study aimed to explore the patterns of community health risk perception  
61 towards COVID-19 in South Korea using Internet search data. This novel approach is potentially  
62 used so that the Internet query data could be provided more easily, in a timely manner, and in a

Reserved space. Do not place any text in this section. Include the mandatory author checklist or your manuscript will be returned. Use continuous line numbering in your manuscript.

63 cost-effective way compared with the survey method (12) and also potentially capture anomalous  
64 patterns in real time (13). In this analysis, we utilized Google and NAVER relative search  
65 volume (RSV) to represent the online queries from the biggest search engine and Korean local  
66 search engine. This study explored the patterns of public health risk perception towards the  
67 ongoing outbreak in several different perspectives including time, population characteristics, and  
68 location as used in epidemiological studies. Future studies are warranted in order to define the  
69 best lagged period in performing effective risk communication in early stage of disease outbreak.

## 70 **Methods**

### 71 **Datasets**

72 Numbers of new COVID-19 cases and coronavirus tests performed on a daily basis were  
73 collected from the South Korea open access data set from Kaggle by Joong Kun Lee and  
74 colleagues in collaboration with the Korea Centre for Disease Control and Prevention (KCDC)  
75 from January 20 to March 22, 2020 (3). We used the Time.csv dataset to retrieve the number of  
76 new daily COVID-19 cases and tests on a daily basis and TimeProvince.csv dataset to collect the  
77 cumulative coronavirus cases by region. Those datasets covered all cities in South Korea. We  
78 used all data provided, including those during the observation period. By contrast, Internet search  
79 data related to COVID-19 were retrieved from Google Trends (<https://trends.google.com/>) and  
80 NAVER websites (<https://datalab.naver.com/>) in the same geolocation. The information searched  
81 were collected six weeks earlier from December 5, 2019, to explore the patterns prior to the  
82 occurrence of the first COVID-19 case in South Korea. Google and NAVER RSV data were  
83 collected using COVID-19-related terms including coronavirus (코로나 바이러스), coronavirus  
84 test (코로나 바이러스 테스트), MERS (메르스), facemask (마스크), and social distancing

Reserved space. Do not place any text in this section. Include the mandatory author checklist or your manuscript will be returned. Use continuous line numbering in your manuscript.

85 (사회적 거리두기) in Korean language and retrieved according to time, gender, age groups,  
86 type of devices, and location.

## 87 **Analysis**

88 The data were analyzed in a single graphical form to explore the trends in the new  
89 COVID-19 cases, number of tests, and Internet searches on a daily basis. Time-lagged  
90 correlation calculated by Spearman's rank correlation coefficients were employed to assess  
91 whether correlations between new COVID-19 cases, Google, and NAVER RSV were affected by  
92 time within 3 days of lagged and lead period. The statistical analysis was performed using  
93 STATA13, and strong correlations were defined as correlation coefficients greater than 0.7.  
94 Moreover, multilayer maps created using Tableau Public were generated to define the  
95 distributions of new COVID-19 cases and Internet searches.

## 96 **Results**

97 Community health risk perception captured by Google and NAVER RSV were divided into  
98 several parts, including patterns by time, population characteristics, and location:

### 99 **Trends in new COVID-19 cases, number of tests, and Internet searches on a daily basis**

100 South Korea reported the first case of COVID-19 on January 20, 2020, as shown in  
101 Figure 1 with three peaks of disease transmissions. The first peak occurred until February 18,  
102 2020. The average new cases increased to 311 and dramatically decreased to 110 cases per day  
103 since March 16, 2020. As of March 22, 2020, South Korea reported 8,897 cases of COVID-19.  
104 On the contrary, an immense number of tests were also performed during the outbreak. South  
105 Korea has performed 5,266 tests per day on average from January 20 to March 22, 2020, and

Reserved space. Do not place any text in this section. Include the mandatory author checklist or your manuscript will be returned. Use continuous line numbering in your manuscript.

106 466,804 tests in total as of April 6, 2020, recording South Korea as a country with the third  
107 highest number of tests performed.

108       During the outbreak, trends of information searches for coronavirus (코로나 바이러스)  
109 captured by Google and NAVER were similar as shown in Figure 2(A). Three huge peaks of  
110 Internet searches were observed in the second and fifth week of January and in the fourth week  
111 of February 2020. Coronavirus-related searches remained high for several days since the first  
112 COVID-19 case was reported in Wuhan on December 12, 2019 along with MERS (메르스)-  
113 related queries which also elevated in last two peaks. However, massive surges of information  
114 searches occurred along with the identification of the first COVID-19 case in South Korea on  
115 January 20 and the WHO's declaration of the Public Health Emergency of International Concern  
116 (PHEIC) on January 30, 2020. Compared with the daily data on new COVID-19 cases,  
117 information searches provided by Google Trends and NAVER peaked six to seven days earlier.  
118 The third peak of coronavirus searches possibly correspond to the immense increase in the  
119 number of new COVID-19 cases due to local transmission. Searches gradually decreased even  
120 after the outbreak was declared as a pandemic by the WHO on March 11, 2020 (1).

121       Furthermore, coronavirus test-related searches (코로나 바이러스 테스트) were not  
122 captured in Google Trends; hence, Figure 2(B) only showed NAVER RSV related to coronavirus  
123 tests, facemask, and social distancing. Increases in the Internet searches were observed weeks  
124 after the COVID-19 cases were reported and before coronavirus test kit was approved on  
125 February 7, 2020 (14). The second wave of information searches was found in the third week of  
126 February 2020, which might be caused by the increase in the number of new COVID-19 cases

Reserved space. Do not place any text in this section. Include the mandatory author checklist or your manuscript will be returned. Use continuous line numbering in your manuscript.

127 and the implementation of coronavirus drive-through tests on February 23, 2020 (6). However,  
128 patterns of coronavirus test-related searches seemed more similar to trends of new COVID-19  
129 cases compared with the daily numbers of tests.

130 Similar patterns to the online queries on coronavirus test were also identified for  
131 facemasks (마스크). In the role of personal protective measures, facemask-related queries were  
132 elevated in the same period when people started to search for coronavirus tests and facemask  
133 shortage in early February (15), and gradually declined in late of February as the regular supply  
134 of facemask has been provided government (16). Besides, the massive increase of locally  
135 acquired cases also induced huge internet searches related to social distancing (사회적  
136 거리두기) as one of the preventive approaches. Those searches reached their peaks as a  
137 widespread campaign for social distancing in the first week of March 2020 in South Korea (5).

### 138 **Time-lagged correlations between new COVID-19 cases and Internet searches in different** 139 **gender and age groups**

140 As shown in Table 1, results demonstrated a moderate correlation (0.640) between new  
141 COVID-19 cases and Google RSV related to coronavirus in lag -3. On the contrary, the high  
142 correlations (0.718) of coronavirus information searches counted for both men and women in lag  
143 -3 showed no differences for NAVER RSV. However, the correlations varied across different  
144 age groups and lagged periods. High correlations were observed in lag -3 for overall ages  
145 (0.729), and those aged  $\leq 18$  years (0.821), 19-24 years (0.784), 25-29 years (0.726), 50-54  
146 years (0.706), and  $\geq 50$  years (0.725). Meanwhile the lowest correlation was found at the age  
147 group of 35-39 years old (0.622). The  $\leq 18$  year and 19-24 year age groups for NAVER RSV

Reserved space. Do not place any text in this section. Include the mandatory author checklist or your manuscript will be returned. Use continuous line numbering in your manuscript.

148 have high correlations in almost all lagged and lead periods. Moreover, the strength of  
149 correlations was decreased in the lead period or a few days after the number of new COVID-19  
150 cases increased, either for Google or NAVER RSV. Compared to NAVER RSV, Google RSV  
151 for coronavirus has lower correlations with new COVID-19 cases.

152 Different patterns occurred for coronavirus test-related search. No correlation could be  
153 calculated for Google RSV due to the insufficient number of queries recorded. High correlations  
154 were found in lag  $-1$  for men (0.795) and lead 1 for women (0.823) for NAVER RSV, as well as  
155 for all age groups in lead 1 (0.828). Moreover, weak to strong correlations were reported in  
156 different age groups. The 19–24-year age group has a high correlation (0.725) in lag  $-1$  followed  
157 by the 30–34-year age group (0.786 in lead 1), 35–39-year age group (0.826 in lag  $-1$ ), and 40–  
158 44-year age group (0.755 in lag 0), respectively.

## 159 **Trends in online information searches based on the type of devices used for assessing** 160 **Internet**

161 Figure 3(A) showed the trends of online information searches for coronavirus and  
162 coronavirus tests in mobile devices and desktops. Mobile search queries for coronavirus were in-  
163 line with the desktop search during the first peak. However, mobile searches were higher either  
164 in the second or third peak of the outbreak. For coronavirus test-related searches, mobile  
165 searches seemed to be more frequent and stable than those of desktop searches, in all peaks.

166 Spearman's rank correlation coefficient in Figure 3(B) showed high correlations for  
167 overall dataset (mobile and desktop searches) of coronavirus searches in lag  $-3$  (0.729), as well  
168 as mobile searches (0.761). Interestingly, mobile searches have stronger correlation coefficients  
169 in all lagged and lead periods than the overall searches. Yet, weak-to-moderate correlations



Reserved space. Do not place any text in this section. Include the mandatory author checklist or your manuscript will be returned. Use continuous line numbering in your manuscript.

170 (0.417–0.546) were observed for coronavirus-related searches through desktop devices. For  
171 coronavirus test online searches, high correlations (0.770–0.828) were reported in all lagged and  
172 lead days. Still, mobile searches were observed to have a higher correlation coefficient than  
173 desktop searches. The highest correlation found in lag 0 for mobile searches (0.804) and lag –1  
174 for desktop searches (0.717).

## 175 **Distributions of new COVID-19 cases and Internet searches**

176 Spatial distributions of new COVID-19 cases and Google RSV are illustrated in Figure 4.  
177 Results showed that 9 days before the confirmed cases were reported in South Korea, the  
178 numbers of Google RSV related to coronavirus captured in Gyeonggi-do, Seoul, and Incheon  
179 Province increased. Then, the aforementioned provinces reported COVID-19 confirmed cases.  
180 During the early weeks of disease transmission, COVID-19 spread in Seoul, Incheon, Gwangju,  
181 Gyeonggi-do, and Jeollabuk-do as shown in Figure 4(B-D). Similar patterns were also captured  
182 for Google RSV that seemed to be elevated along with those periods in the western part of South  
183 Korea where the confirmed cases were reported.

184 Furthermore, a huge surge of new COVID-19 cases started on February 19, 2020, as  
185 shown in Figure 4(E). Google RSV gradually increased during those periods for the eastern part  
186 of South Korea including Daegu, the epicentre for local transmission, which contributed to  
187 71.79% of the confirmed cases or 262.14 cases per 100,000 population (17). Increases in online  
188 searches were observed in Gangwon-do, Gyeongsangbuk-do, Chungcheongbuk-do, Daejeon,  
189 Gyeongsangnam-do, and Jeollanam-do, the surrounding provinces of Daegu. The massive  
190 numbers of locally acquired cases occurred from February 25 to March 4, 2020 (Figure 4(F)) and  
191 quickly declined in the mid of March (Figure 4(G)). When number of new cases decreased, the

Reserved space. Do not place any text in this section. Include the mandatory author checklist or your manuscript will be returned. Use continuous line numbering in your manuscript.

192 number of Internet searches in the western part of South Korea started to increase, which showed  
193 an elevation in the number of COVID-19 cases in the later part of the study period (Figure 4(H)).  
194 Interestingly, Internet queries remained high (66-100 points) in Jeju, one of the most famous  
195 tourist destinations, during the period of observation; meanwhile, the incidence rate was only  
196 0.60 per 100,000 population. By contrast, the incidence of COVID-19 in Sejong was 12 times  
197 higher (11.98 per 100,000 population) than that in Jeju. However, the number of search queries  
198 throughout the observation period was low.

## 199 **Discussion**

200 Risk perception was defined as a person's subjective judgments toward the likelihood of  
201 negative occurrences including diseases or illnesses (18). In terms of disease outbreak,  
202 understanding the community health risk perception is urgently needed in the early phase of an  
203 outbreak particularly in the case of an emerging disease. This is because, in the initial period,  
204 there will be limited treatments, few numbers of resources, and delays in active interventions  
205 (19). Therefore, exploring the perception of risk would be a necessary step in managing the risk  
206 of outbreak. Since a robust public risk perception assessment could help in divining effective risk  
207 communication, this step should be conducted immediately to reduce the impact of the COVID-  
208 19 outbreak. Consequently, it would be more affordable to conduct the community health risk  
209 perception assessment using Internet search data, since it could be provided more easily, in a  
210 timely manner, and in a cost-effective way compared with a survey method (12) and also  
211 potentially capture anomalous patterns in real-time (13). With the widespread use of mobile  
212 devices and Internet, Internet search data could be more accurate in representing the community  
213 health risk perception (20) as information seeking intention is directly affected by risk perception  
214 (9).

Reserved space. Do not place any text in this section. Include the mandatory author checklist or your manuscript will be returned. Use continuous line numbering in your manuscript.

215           In this study, we found various correlations, which ranged from weak to strong  
216 correlations, among Google, NAVER RSV, new COVID-19 cases and number of tests. Previous  
217 studies also reported high correlations between Google and NAVER RSV compared with  
218 surveillance data (12, 21). Therefore, immense searches of COVID-19-related information might  
219 represent the community health risk perception during local and international events. NAVER  
220 RSV, as a local search engine that obtained the second largest market share in South Korea,  
221 tends to be more sensitive against local issues such as coronavirus test as shown in Figure 2(B).  
222 A similar result has also been reported in a previous study which demonstrated that Baidu has  
223 better predictive performance for disease prediction than Google RSV (21). These findings  
224 suggest that NAVER RSV could also potentially complement the use of Google RSV, which is  
225 excessively utilized in the field of surveillance and health risk perception assessment.

226           Patterns of community risk perception retrieved from information searches in this  
227 analysis were explained in different aspects: time, gender, age groups, type of devices used for  
228 accessing Internet, and spatial distributions. Patterns according to time showed that online  
229 queries related to COVID-19 increased during local events including the local transmission,  
230 approval of coronavirus test kits, implementation of coronavirus drive-through tests, facemask  
231 shortage, and widespread campaign for social distancing as well as during international events  
232 such as the announcement of PHEIC. Yet, South Korea was also one of the countries affected by  
233 the MERS epidemics (22). That experience might also be one of the reasons for the increased  
234 searches for coronavirus even though cases have not yet been detected. These findings indicated  
235 that public health risk perception increased following both local and international crises. Hence,  
236 risk communication should be conducted promptly, considering that health risk perception might  
237 be change over time as the outbreak progresses.

Reserved space. Do not place any text in this section. Include the mandatory author checklist or your manuscript will be returned. Use continuous line numbering in your manuscript.

238           Patterns by time also revealed the decreased number of Google and NAVER RSV in the  
239 middle of the epidemic curve, which might be caused by the extensive availability of online  
240 news and health expert reports during this period (23). It might also be provoked by the  
241 decreased risk perception as the epidemic progressed (7). Thus, utilizing Internet query data in  
242 analyzing community risk perception could be useful in the early stage of an outbreak.

243           Moreover, patterns by different age groups presented that the younger ( $\leq 29$  years old)  
244 and older age groups ( $\geq 50$  years old) have high correlations of Internet searches for coronavirus  
245 with new COVID-19 cases. This finding demonstrated high-risk perception from those age  
246 groups, even three days prior to the increase in the number of new COVID-19 cases. High-risk  
247 perception in younger age groups might be induced by massive Internet access for acquiring  
248 information and high numbers of confirmed cases in that age group (33.24%) in South Korea  
249 (17, 24). Meanwhile, perceived vulnerability might be common in older age groups since older  
250 age is one of the prominent risk factors for COVID-19 mortality (25), and 98.08% of fatal cases  
251 in South Korea occurred in older adults (17). Accordingly, a previous study also showed that the  
252 older age group has a higher risk perception (7).

253           By contrast, the age group of 30 to 49 years old only showed low to moderate  
254 correlations even for three days before the event. It might be due to the lower percentage of  
255 confirmed cases (23.94%) in that age group compared with that in the younger age group ( $\leq 29$   
256 years), which could also influence the health risk perception. Meanwhile, online queries for  
257 coronavirus test showed the high-risk perception in the 35–39-years age group. These findings  
258 illustrate that adults perceived the coronavirus test-related information as more important than  
259 disease-related knowledge. It might be also influenced by massive coronavirus test conducted so  
260 far. Meanwhile, the younger (aged  $\leq 29$  years) and older age groups (aged  $\geq 50$  years old) have a

Reserved space. Do not place any text in this section. Include the mandatory author checklist or your manuscript will be returned. Use continuous line numbering in your manuscript.

261 different perception, making the infection-related information among the essential searches. In  
262 terms of gender, both men and women perceived coronavirus as the same level of risk, but higher  
263 in women for coronavirus test. This result is similar to that reported a previous study which  
264 showed a higher risk perception in the female group (7). Hence, health risk communication  
265 should be carried in both men and women as well as in vulnerable age groups.

266 For device utilization, patterns demonstrated that mobile searches have greater  
267 correlations with COVID-19-related searches compared with desktop queries. High correlations  
268 for mobile searches were even observed three days prior to the disease onset. However, desktop  
269 searches showed high correlation in lag  $-1$ , which was two days late, compared with mobile  
270 searches. This finding implies that high-risk perception stimulated enormous number of mobile  
271 searches during the outbreak period. Identical results were also illustrated in previous study by  
272 Soo-Yong Shin and colleagues (12). With the widespread use of mobile devices in the digital era  
273 (20), this promoted a change in the behavior, from desktop to mobile device use. Therefore, the  
274 government should ensure that risk communication could be assessed easily through mobile  
275 devices.

276 Research findings also demonstrated that the distributions of Internet searches were  
277 higher in the location with new COVID-19 cases. This finding was similar to that in previous  
278 studies which indicated that people in affected areas have higher risk perception (7, 11).  
279 However, Internet searches continued to increase in a vulnerable location such as tourist sites  
280 including Jeju. Those findings demonstrated that health risk communication is urgently needed  
281 in affected and vulnerable areas.

Reserved space. Do not place any text in this section. Include the mandatory author checklist or your manuscript will be returned. Use continuous line numbering in your manuscript.

282           In brief, this study provided the depiction of community health risk perception toward  
283 COVID-19 in South Korea, which tends to be higher in the period of local and international  
284 events, along with women, certain age groups ( $\leq 29$ , 35–39 and  $\geq 50$ -years age group), and people  
285 in the affected areas. Moreover, during the outbreak, people were more likely to access the  
286 Internet through mobile devices, which are potential channels where health risk communication  
287 can be disseminated effectively. This method demonstrated an easy and low-cost approach to  
288 estimate health risk perception during the pandemic. Since providing a rapid risk perception  
289 assessment is urgently needed in the early stage of an outbreak, combining Google and NAVER  
290 RSV could be beneficial for targeting risk communication in terms of time, population  
291 characteristics, and location. Google RSV alone only revealed the patterns according to time and  
292 location (26). As online search queries might change over time, finding the best lagged time for  
293 conducting risk communication would be challenging.

## 294 **Conclusion**

295           Community health risk perceptions toward COVID-19 outbreak in South Korea observed  
296 from Google and NAVER RSV increased during local and international events, and were higher  
297 in women, certain age groups as well as in affected areas. While NAVER RSV tends to be more  
298 sensitive against local issues, integrating Google and NAVER RSV could potentially provide  
299 varied patterns in terms of time, population characteristics, and location.

## 300 **Ethical approval**

301           No need for ethical approval as used of anonymous open data.

## 302 **Funding**

Reserved space. Do not place any text in this section. Include the mandatory author checklist or your manuscript will be returned. Use continuous line numbering in your manuscript.

303           This study was funded in part by the Ministry of Science and Technology (MOST) in  
304 Taiwan (grant number MOST108-2221-E-038-018) and the Higher Education Sprout Project by  
305 the Ministry of Education (MOE) in Taiwan (grant number DP2-108-21121-01-A-01-04) to  
306 Emily Chia-Yu Su. For Eunha Shim, this work was supported by the National Research  
307 Foundation of Korea (NRF) grant funded by the Korea government (MSIT) (No.  
308 2018R1C1B6001723). The sponsor had no role in the research design or contents of the  
309 manuscript for publication.

### 310 **Conflicts of interest**

311           None.

### 312 **Acknowledgments**

313           We gratefully thank Joong Kun Lee and colleagues for providing open access data on  
314 COVID-19-related information in South Korea on kaggle.com.

### 315 **Author Bio**

316           Atina Husnayain is a PhD student in Biomedical Informatics at Graduate Institute of  
317 Biomedical Informatics, Taipei Medical University. Her research interests focus on digital  
318 epidemiology, information technology-based surveillance, spatial epidemiologi, and machine  
319 learning.

### 320 **References**

321 1. World Health Organization. WHO Director-General's opening remarks at the media briefing  
322 on COVID-19 - 11 March 2020: World Health Organization; 2020 [updated March 11; cited

Reserved space. Do not place any text in this section. Include the mandatory author checklist or your manuscript will be returned. Use continuous line numbering in your manuscript.

- 323 2020 March 30]. Available from: <https://www.who.int/dg/speeches/detail/who-director->  
324 [general-s-opening-remarks-at-the-media-briefing-on-covid-19---11-march-2020](https://www.who.int/dg/speeches/detail/who-director-general-s-opening-remarks-at-the-media-briefing-on-covid-19---11-march-2020).
- 325 2. World Health Organization. Coronavirus disease 2019 (COVID-19): Situation Report – 77.  
326 World Health Organization; 2020 April 6.
- 327 3. Lee J, Yu B, Kim M, Jang S, Ryoo S, Choi W, et al. Data Science for COVID-19 (DS4C).  
328 2020.
- 329 4. Shim E, Tariq A, Choi W, Lee Y, Chowell G. Transmission potential and severity of COVID-  
330 19 in South Korea. *Int J Infect Dis.* 2020;93:339-44.
- 331 5. Gallo W. South Korea Tries ‘Social Distancing’ to Prevent Coronavirus Spread: VOA News;  
332 2020 [updated March 6; cited 2020 March 30]. Available from:  
333 [https://learningenglish.voanews.com/a/south-korea-tries-social-distancing-to-prevent-](https://learningenglish.voanews.com/a/south-korea-tries-social-distancing-to-prevent-coronavirus-spread/5316633.html)  
334 [coronavirus-spread/5316633.html](https://learningenglish.voanews.com/a/south-korea-tries-social-distancing-to-prevent-coronavirus-spread/5316633.html).
- 335 6. Kwon KT, Ko JH, Shin H, Sung M, Kim JY. Drive-Through Screening Center for COVID-19:  
336 a Safe and Efficient Screening System against Massive Community Outbreak. *J Korean Med*  
337 *Sci.* 2020;35(11):e123.
- 338 7. Jang WM, Kim UN, Jang DH, Jung H, Cho S, Eun SJ, et al. Influence of trust on two different  
339 risk perceptions as an affective and cognitive dimension during Middle East respiratory  
340 syndrome coronavirus (MERS-CoV) outbreak in South Korea: serial cross-sectional surveys.  
341 *BMJ Open.* 2020;10(3):e033026.
- 342 8. World Health Organization. Emergencies preparedness, response: What is phase 6? : World  
343 Health Organization; 2009.



Reserved space. Do not place any text in this section. Include the mandatory author checklist or your manuscript will be returned. Use continuous line numbering in your manuscript.

- 344 9. Hubner AY, Hovick SR. Understanding Risk Information Seeking and Processing during an  
345 Infectious Disease Outbreak: The Case of Zika Virus. *Risk Anal.* 2020.
- 346 10. Lohiniva AL, Sane J, Sibenberg K, Puumalainen T, Salminen M. Understanding coronavirus  
347 disease (COVID-19) risk perceptions among the public to enhance risk communication efforts:  
348 a practical approach for outbreaks, Finland, February 2020. *Euro Surveill.* 2020;25(13).
- 349 11. Yang JZ. Whose Risk? Why Did the U.S. Public Ignore Information About the Ebola  
350 Outbreak? *Risk Anal.* 2019;39(8):1708-22.
- 351 12. Shin SY, Kim T, Seo DW, Sohn CH, Kim SH, Ryoo SM, et al. Correlation between National  
352 Influenza Surveillance Data and Search Queries from Mobile Devices and Desktops in South  
353 Korea. *PLoS One.* 2016;11(7):e0158539.
- 354 13. Zhang Y, Yakob L, Bonsall MB, Hu W. Predicting seasonal influenza epidemics using cross-  
355 hemisphere influenza surveillance data and local internet query data. *Sci Rep.* 2019;9(1):3262.
- 356 14. Normile D. Coronavirus cases have dropped sharply in South Korea. What's the secret to its  
357 success? : American Association for the Advancement of Science; 2020 [updated March 17;  
358 cited 2020 March 30]. Available from:  
359 [https://www.sciencemag.org/news/2020/03/coronavirus-cases-have-dropped-sharply-south-](https://www.sciencemag.org/news/2020/03/coronavirus-cases-have-dropped-sharply-south-korea-whats-secret-its-success#)  
360 [korea-whats-secret-its-success#](https://www.sciencemag.org/news/2020/03/coronavirus-cases-have-dropped-sharply-south-korea-whats-secret-its-success#).
- 361 15. Arin K. Still not enough face masks to go around: The Korea Herald 2020 [updated March 1;  
362 cited 2020 April 16]. Available from:  
363 <http://www.koreaherald.com/view.php?ud=20200229000149>.

Reserved space. Do not place any text in this section. Include the mandatory author checklist or your manuscript will be returned. Use continuous line numbering in your manuscript.

- 364 16. OBE TG, Howard J. Masks for all? The science says yes. 2020 [updated April 13; cited 2020  
365 April 24]. Available from: <https://www.fast.ai/2020/04/13/masks-summary/>.
- 366 17. Korean Center for Disease Control and Prevention. Press Release: The updates on COVID-19  
367 in Korea as of 22 March: Korean Center for Disease Control and Prevention; 2020 [updated  
368 March 22; cited 2020 March 30]. Available from:  
369 <https://www.cdc.go.kr/board/board.es?mid=a30402000000&bid=0030>.
- 370 18. Paek H-J, Hove T. Risk Perceptions and Risk Characteristics. Oxford Research Encyclopedia  
371 of Communication 2017.
- 372 19. World Health Organization. World Health Organization Outbreak Communication Planning  
373 Guide. Geneva: World Health Organization; 2008.
- 374 20. Liang B, Scammon DL. Incidence of online health information search: a useful proxy for  
375 public health risk perception. *J Med Internet Res*. 2013;15(6):e114.
- 376 21. Li C, Chen LJ, Chen X, Zhang M, Pang CP, Chen H. Retrospective analysis of the possibility  
377 of predicting the COVID-19 outbreak from Internet searches and social media data, China,  
378 2020. *Euro Surveill*. 2020;25(10).
- 379 22. Kim HJ. South Korea learned its successful Covid-19 strategy from a previous coronavirus  
380 outbreak: MERS Chicago: *Bulletin of the Atomic Scientists*; 2020 [updated March 20; cited  
381 2020 April 19]. Available from: [https://thebulletin.org/2020/03/south-korea-learned-its-  
382 successful-covid-19-strategy-from-a-previous-coronavirus-outbreak-mers/](https://thebulletin.org/2020/03/south-korea-learned-its-successful-covid-19-strategy-from-a-previous-coronavirus-outbreak-mers/).

Reserved space. Do not place any text in this section. Include the mandatory author checklist or your manuscript will be returned. Use continuous line numbering in your manuscript.

383 23. Keller M, Blench M, Tolentino H, Freifeld CC, Mandl KD, Mawudeku A, et al. Use of  
384 unstructured event-based reports for global infectious disease surveillance. *Emerg Infect Dis.*  
385 2009;15(5):689-95.

386 24. Korea internet and security agency. 2018 Korea internet white paper. Korea internet and  
387 security agency; 2020.

388 25. Zhou F, Yu T, Du R, Fan G, Liu Y, Liu Z, et al. Clinical course and risk factors for mortality  
389 of adult inpatients with COVID-19 in Wuhan, China: a retrospective cohort study. *The Lancet.*  
390 2020;395(10229):1054-62.

391 26. Husnayain A, Fuad A, Su EC. Applications of google search trends for risk communication in  
392 infectious disease management: A case study of COVID-19 outbreak in Taiwan. *Int J Infect*  
393 *Dis.* 2020.

394

395 Address for correspondence: Emily Chia-Yu Su, Graduate Institute of Biomedical Informatics,  
396 College of Medical Science and Technology, Taipei Medical University, Taipei, Taiwan; postal  
397 address: 172-1 Keelung Rd., Sec. 2, Taipei 106, Taiwan; phone number: +886 2-66382736 ext.  
398 1515; email: [emilysu@tmu.edu.tw](mailto:emilysu@tmu.edu.tw)

399

Reserved space. Do not place any text in this section. Include the mandatory author checklist or your manuscript will be returned. Use continuous line numbering in your manuscript.

400 Table 1. Time-lagged correlation coefficients between new COVID-19 cases, Google, and NAVER RSV related to coronavirus and coronavirus  
401 test in South Korea.

| coronavirus (코로나 바이러스)          |               |              |              |                        |              |              |              |              |              |              |              |              |              |
|---------------------------------|---------------|--------------|--------------|------------------------|--------------|--------------|--------------|--------------|--------------|--------------|--------------|--------------|--------------|
| Day-                            | Google Trends | NAVER        |              |                        |              |              |              |              |              |              |              |              |              |
|                                 |               | Gender       |              | Age groups (years old) |              |              |              |              |              |              |              |              |              |
|                                 |               | Male         | Female       | Overall                | ≤18          | 19-24        | 25-29        | 30-34        | 35-39        | 40-44        | 45-49        | 50-54        | ≥55          |
| -3                              | <b>0.64</b>   | <b>0.718</b> | <b>0.718</b> | <b>0.729</b>           | <b>0.821</b> | <b>0.784</b> | <b>0.726</b> | <b>0.661</b> | <b>0.622</b> | <b>0.648</b> | <b>0.685</b> | <b>0.706</b> | <b>0.725</b> |
| -2                              | 0.611         | 0.684        | 0.684        | 0.694                  | 0.805        | 0.759        | 0.696        | 0.621        | 0.581        | 0.607        | 0.655        | 0.68         | 0.693        |
| -1                              | 0.594         | 0.67         | 0.67         | 0.681                  | 0.812        | 0.759        | 0.678        | 0.601        | 0.561        | 0.593        | 0.638        | 0.662        | 0.682        |
| 0                               | 0.59          | 0.654        | 0.654        | 0.663                  | 0.803        | 0.737        | 0.659        | 0.578        | 0.538        | 0.565        | 0.606        | 0.634        | 0.655        |
| 1                               | 0.569         | 0.647        | 0.647        | 0.661                  | 0.794        | 0.736        | 0.66         | 0.579        | 0.536        | 0.56         | 0.606        | 0.633        | 0.658        |
| 2                               | 0.532         | 0.591        | 0.591        | 0.606                  | 0.759        | 0.688        | 0.6          | 0.513        | 0.477        | 0.508        | 0.554        | 0.58         | 0.606        |
| 3                               | 0.512         | 0.579        | 0.579        | 0.597                  | 0.749        | 0.682        | 0.587        | 0.5          | 0.468        | 0.498        | 0.537        | 0.565        | 0.592        |
| coronavirus test (코로나 바이러스 테스트) |               |              |              |                        |              |              |              |              |              |              |              |              |              |
| Day-                            | Google Trends | NAVER        |              |                        |              |              |              |              |              |              |              |              |              |
|                                 |               | Gender       |              | Age groups (years old) |              |              |              |              |              |              |              |              |              |
|                                 |               | Male         | Female       | Overall                | ≤18          | 19-24        | 25-29        | 30-34        | 35-39        | 40-44        | 45-49        | 50-54        | ≥55          |
| -3                              | N/A           | 0.739        | 0.769        | 0.77                   | <b>0.595</b> | 0.681        | 0.654        | 0.701        | 0.734        | 0.696        | 0.624        | <b>0.612</b> | 0.441        |
| -2                              | N/A           | 0.769        | 0.79         | 0.797                  | 0.505        | 0.65         | 0.687        | 0.752        | 0.786        | 0.692        | <b>0.673</b> | 0.581        | 0.445        |
| -1                              | N/A           | <b>0.795</b> | 0.799        | 0.824                  | 0.5          | <b>0.725</b> | 0.645        | 0.775        | <b>0.826</b> | 0.704        | 0.63         | 0.532        | 0.434        |
| 0                               | N/A           | 0.778        | 0.799        | 0.812                  | 0.542        | 0.72         | 0.653        | 0.746        | 0.783        | <b>0.755</b> | 0.559        | 0.551        | 0.358        |
| 1                               | N/A           | 0.775        | <b>0.823</b> | <b>0.828</b>           | 0.508        | 0.682        | <b>0.688</b> | <b>0.786</b> | 0.814        | 0.718        | 0.586        | 0.557        | <b>0.45</b>  |
| 2                               | N/A           | 0.756        | 0.802        | 0.805                  | 0.549        | 0.62         | 0.623        | 0.774        | 0.762        | 0.731        | 0.586        | 0.537        | 0.433        |
| 3                               | N/A           | 0.744        | 0.763        | 0.781                  | 0.465        | 0.572        | 0.606        | 0.694        | 0.756        | 0.633        | 0.633        | 0.518        | 0.424        |

402 Note: All correlations are statistically significant at a p-value of ≤0.05. Shade text: high correlation with r>0.7. Text in italic: the highest correlation.

Reserved space. Do not place any text in this section. Include the mandatory author checklist or your manuscript will be returned. Use continuous line numbering in your manuscript.

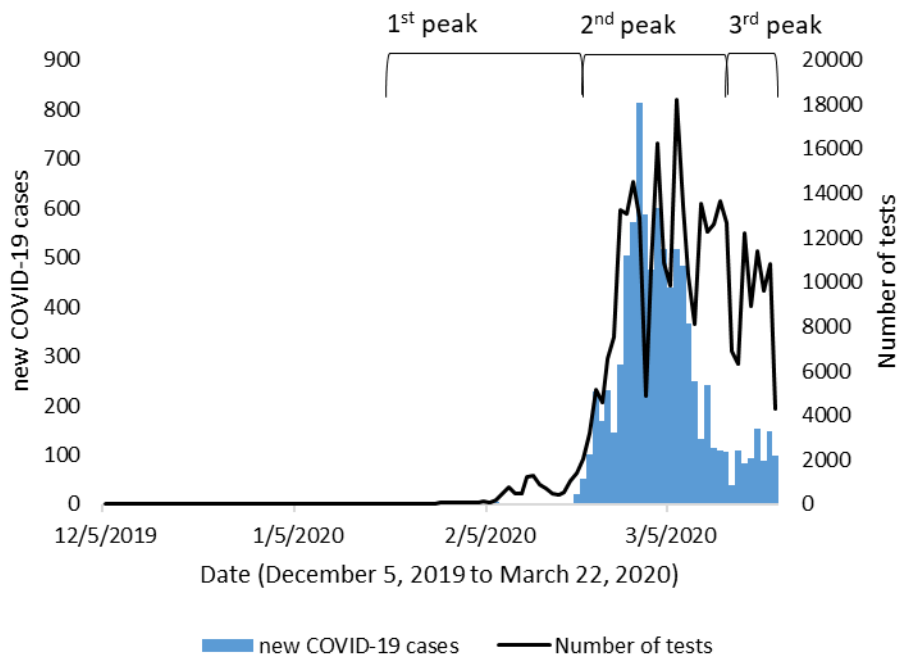

403

404 Figure 1. Time series of new COVID-19 cases and number of tests in South Korea.

Reserved space. Do not place any text in this section. Include the mandatory author checklist or your manuscript will be returned. Use continuous line numbering in your manuscript.

Figure 2A. new COVID-19 cases compared with Google and NAVER RSV related to coronavirus in Korean language

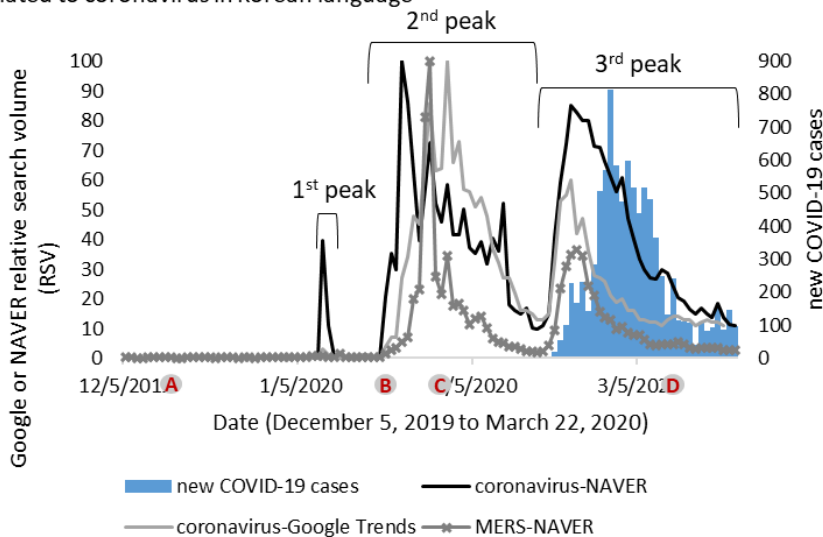

Note:

A: 1<sup>st</sup> case is reported in Wuhan [Dec 12, 2019]

B: 1<sup>st</sup> case is reported in South Korea [Jan 20, 2020]

C: WHO declares the outbreak as Public Health Emergency of International Concern [Jan 30, 2020]

D: WHO declares the outbreak as pandemic [Mar 11, 2020]

Figure 2B. Number of tests compared with NAVER RSV related to coronavirus test, facemask, and social distancing in Korean language

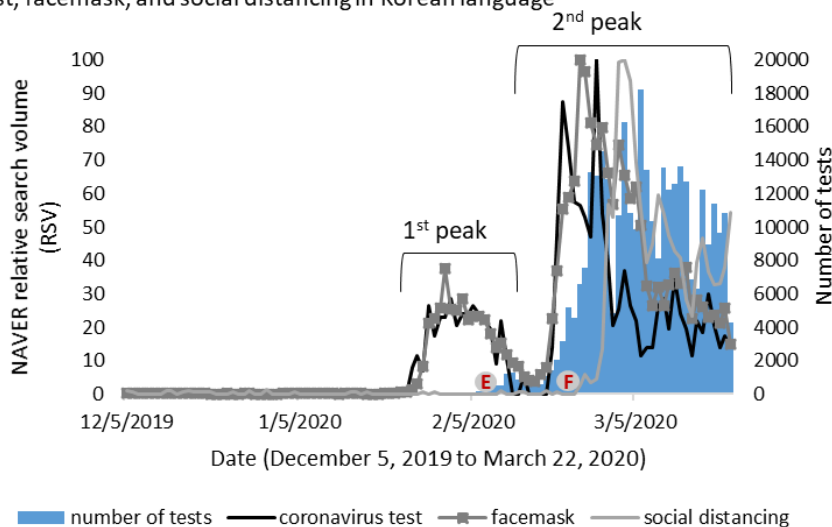

E: 1<sup>st</sup> coronavirus test kit is approved by South Korean CDC [Feb 7, 2020]

F: 1<sup>st</sup> coronavirus drive-through test is opened [Feb 23, 2020]

405

406 Figure 2. Time series of new COVID-19 cases, number of tests, Google, and NAVER RSV related to

407 coronavirus in South Korea.

Reserved space. Do not place any text in this section. Include the mandatory author checklist or your manuscript will be returned. Use continuous line numbering in your manuscript.

Figure 3A. new COVID-19 cases compared with NAVER RSV related to coronavirus and coronavirus test in Korean language

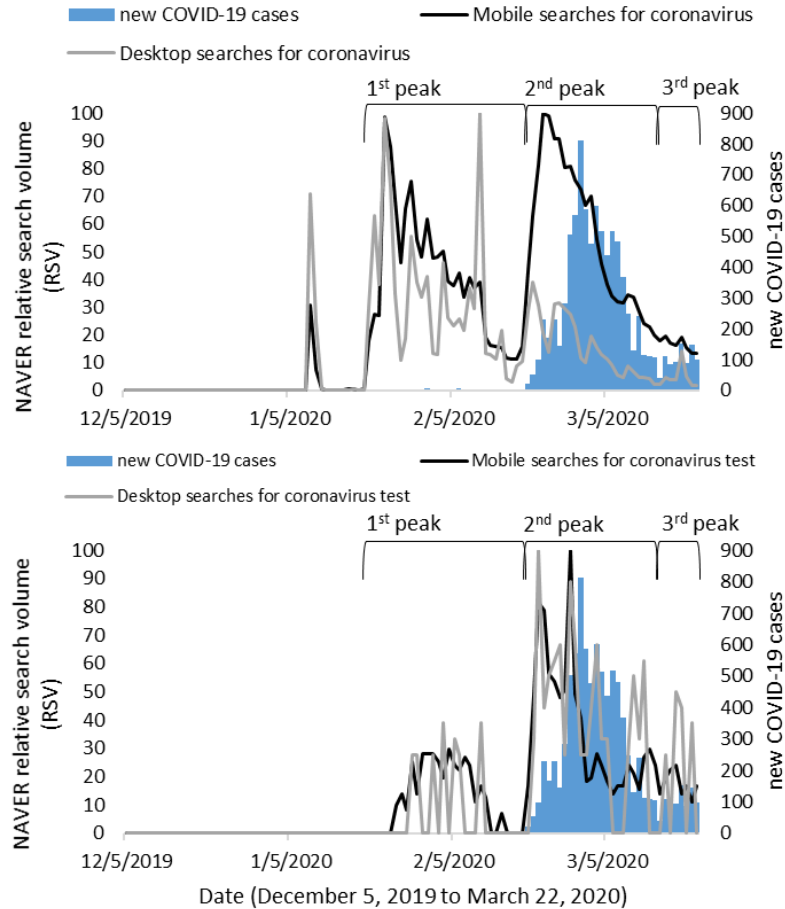

Figure 3B. Time-lagged corr. coeff. between new COVID-19 cases and NAVER RSV related to coronavirus and coronavirus test in South Korea

| Day- | coronavirus searches<br>Type of device |        |         | coronavirus test searches<br>Type of device |        |         |
|------|----------------------------------------|--------|---------|---------------------------------------------|--------|---------|
|      | Overall                                | Mobile | Dekstop | Overall                                     | Mobile | Dekstop |
| -3   | 0.729                                  | 0.761  | 0.546   | 0.770                                       | 0.756  | 0.677   |
| -2   | 0.694                                  | 0.726  | 0.534   | 0.797                                       | 0.787  | 0.657   |
| -1   | 0.681                                  | 0.720  | 0.497   | 0.824                                       | 0.799  | 0.717   |
| 0    | 0.663                                  | 0.704  | 0.461   | 0.812                                       | 0.804  | 0.638   |
| 1    | 0.661                                  | 0.692  | 0.475   | 0.828                                       | 0.804  | 0.705   |
| 2    | 0.606                                  | 0.650  | 0.417   | 0.805                                       | 0.788  | 0.654   |
| 3    | 0.597                                  | 0.633  | 0.423   | 0.781                                       | 0.761  | 0.626   |

Spearman's rank corr. coeff.

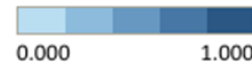

Note: All correlations are statistically significant at a p-value of  $\leq 0.05$ .

408

409 Figure 3. Time series and time-lagged correlation coefficients between new COVID-19 cases and NAVER RSV related to coronavirus for mobile

410 and desktop searches in South Korea.

Reserved space. Do not place any text in this section. Include the mandatory author checklist or your manuscript will be returned. Use continuous line numbering in your manuscript.

411

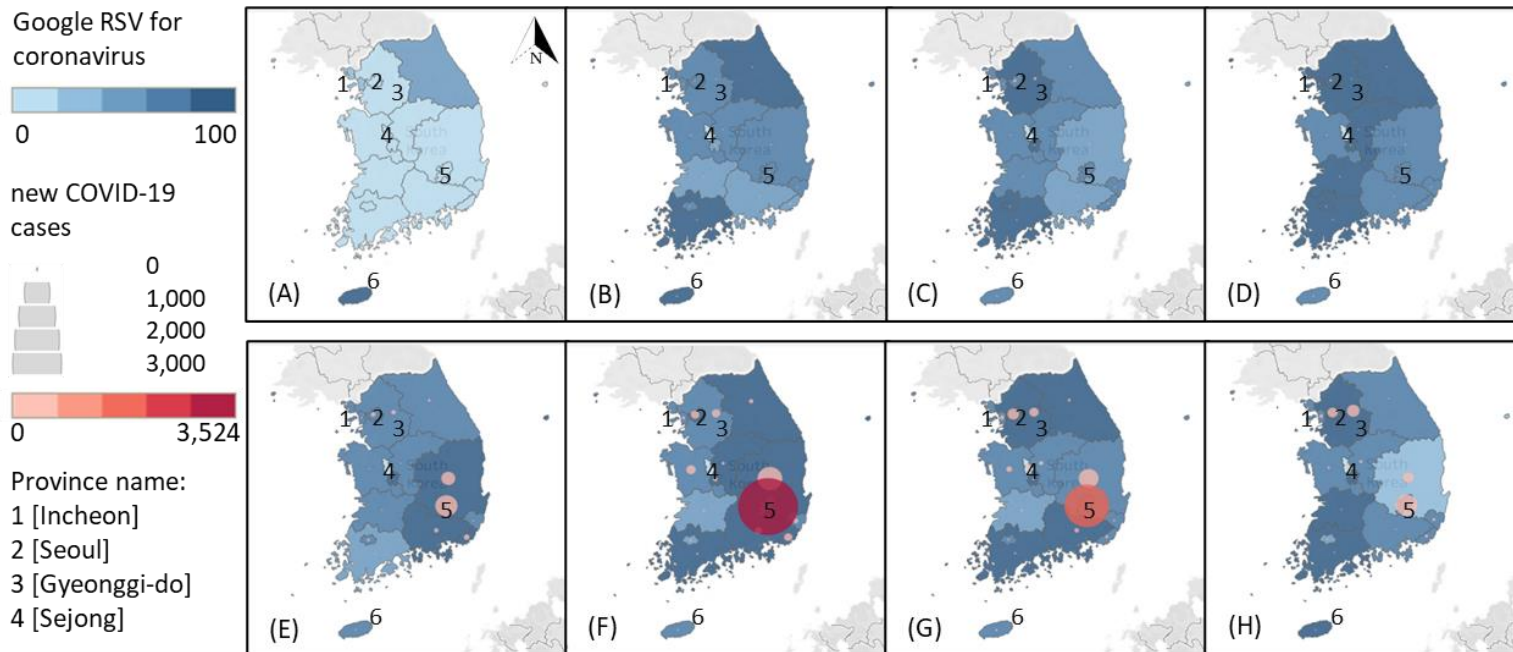

412

413 Figure 4. The numbers of new COVID-19 cases and Google RSV in South Korea: (A) January 11, 2020 to January 19;  
414 January 20, 2020 to January 28, 2020; (B) January 20, 2020 to January 28, 2020; (C) January 29, 2020 to February 6, 2020;  
415 2020; (D) February 7, 2020 to February 15 2020; (E) February 16, 2020 to February 24,  
2020; (F) February 25, 2020 to March 4, 2020; (G) March 5, 2020 to March 13 2020; (H) March 14, 2020 to March 22 2020
